# Supplementary material for: Buprenorphine Use and Spending for Opioid Use Disorder Treatment: Trends From 2003 to 2015
Source: Atypon-hosted journal article supplement (doi:10.1176/appi.ps.201700315), 2018-05-08
Supplement: appi.ps.201700315.ds001.pdf [file appi.ps.201700315.ds001.pdf]

**ONLINE SUPPLEMENT**

Supplement Figure 1: Buprenorphine prescription days supplied by product type, 2003-2015

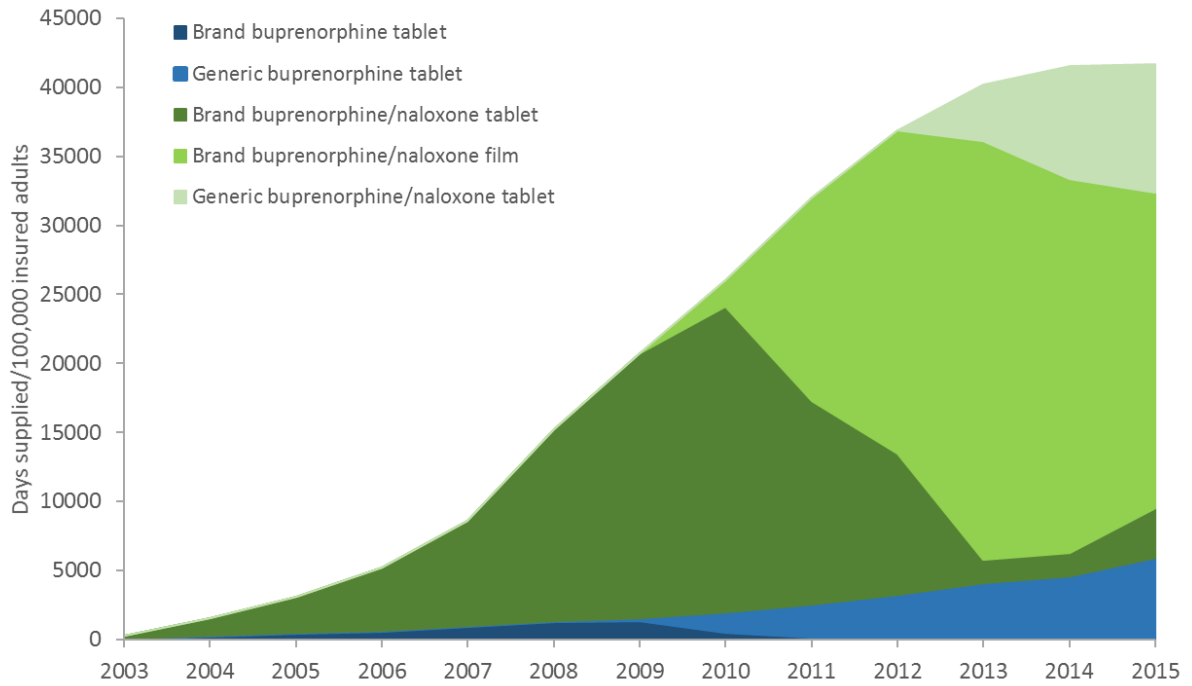



Supplement Figure 2: Median spending on a 30-day buprenorphine prescription fill by product type, 2003-2015

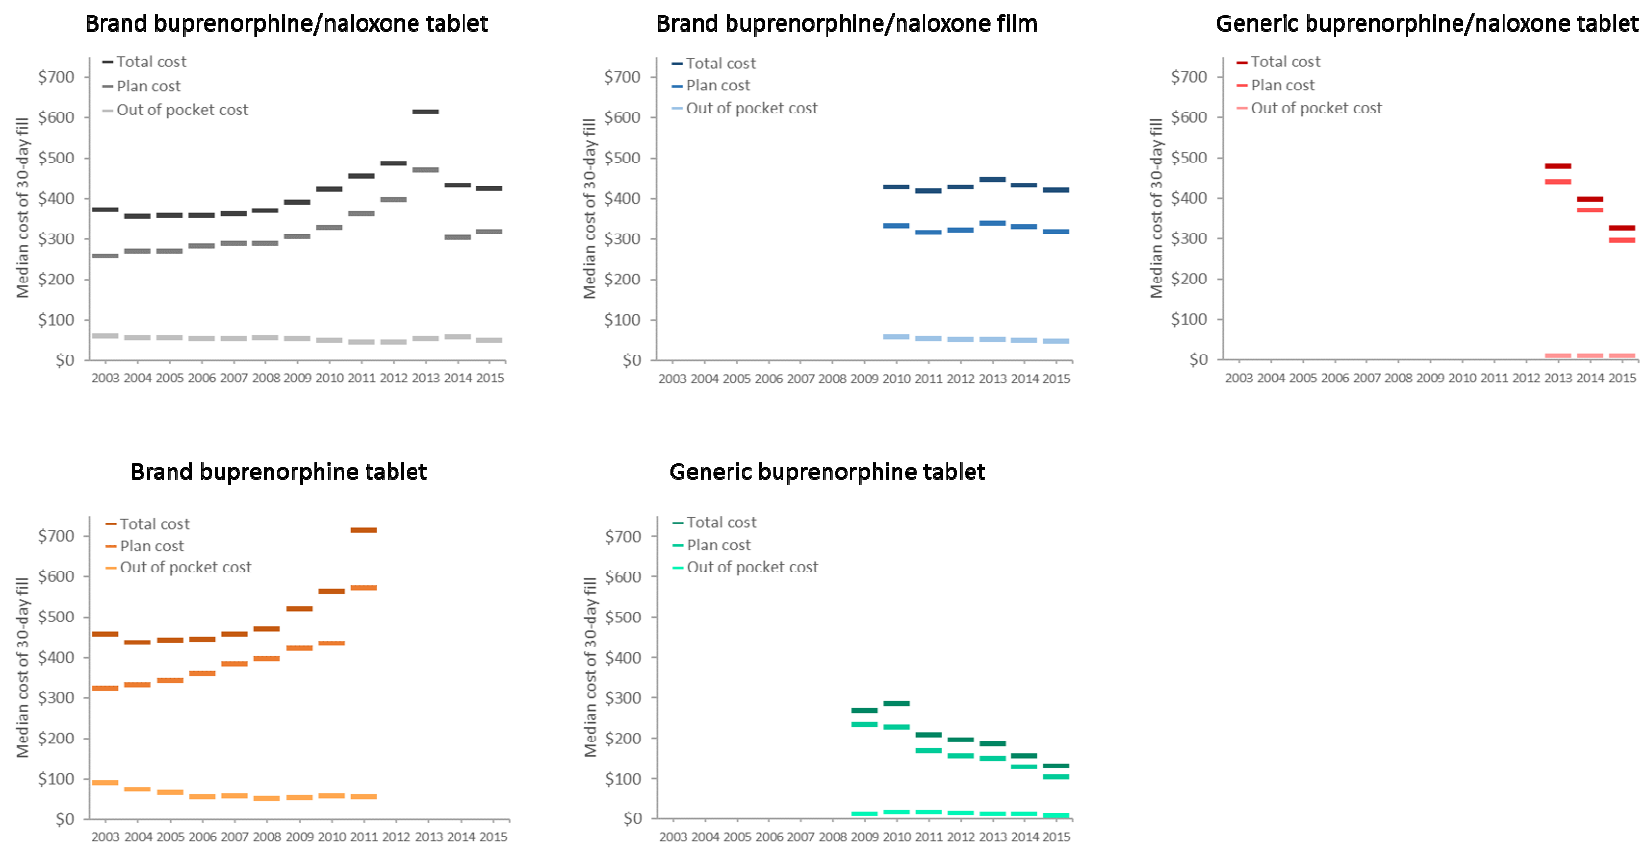

NOTES: Prescription costs were standardized to reflect a 30-day buprenorphine treatment supply and inflated to 2015 dollars using the Medical Care component of the Consumer Price Index. We do not report results in years in which there were fewer than 200 prescription claims for a given buprenorphine product type.
